# Supplementary material for: An efficient synthesis of new fluorinated uracil derivativesElectronic supplementary information (ESI) available: general procedures for the preparation of compounds 3, 6 ,7, 8 and 9. See http://www.rsc.org/suppdata/cc/b3/b300796k/
Source: Royal Society of Chemistry journal article supplement (doi:10.1039/b300796k), 2003-02-27
Supplement: b300796k.doc [file b300796k.doc]

# Supplementary data

An efficient synthesis of new fluorinated uracil derivatives

Santos Fustero,* Esther Salavert, Juan F. Sanz-Cervera, Julio Piera and Amparo Asensio.

**Preparation of compounds 6.** To 10 mL of a 1.4M soln. of LDA in THF ‑78 ºC, a soln. of the oxazoline (**4a**, **4b**, or (*R*)‑**4c**; 15.0 mmol) in THF (15 mL) was added dropwise and the reaction mixture was stirred 1h at ‑78 ºC. A soln. of the nitrile **5** (14 mmol) in THF (10mL) was slowly added. After 2h, the reaction was quenched with satd. aq. NH4Cl soln. and extracted with CH2Cl2. The organic extract was washed with brine, dried on anh. Na2SO4, and concentrated to give crude product **6**, which was purified by means of CC [*n*‑hexane:EtOAc (3:1)] on deactivated silica gel (Et3N 2%) and crystallization (where suitable).

**Preparation of compounds 7 and 8.** To a soln. of triphosgene (1.0 mmol) in toluene (1 mL) and THF (5 mL), a soln. of compound **6** (1.0 mmol) in THF (5 mL) was slowly added, followed by triethylamine (2.0 mmol). The mixture was stirred at room temperature for 3-7h. Then, it was quenched with satd. aq. NH4Cl soln. at 0ºC and extracted with CH2Cl2. The organic extract was dried on anh. MgSO4, and concentrated under vacuum. The resulting crude mixture of **7** and **8** was separated through CC [*n*‑hexane:EtOAc (1:1)] on deactivated silica gel (Et3N 2%), followed by crystallization.

**Preparation of compounds 3.** *Method A: Basic conditions.* To a soln. of **7** and/or **8** (1.5 mmol) in THF (10mL), a soln. of RO‑/ROH (7.5 mmol) diluted in THF (10mL) was added and then the reaction mixture was refluxed for 5-7 h. It was quenched with 10% aq. NH4Cl and extracted with CH2Cl2. The organic extract was dried and concentrated under vacuum. The resulting crude **3** was then recrystallized from *n*‑hexane:EtOAc. *Method B: Acidic conditions.* To a soln. of **7** and/or **8** (1.5 mmol) in THF (10mL), was added 4N HCl (1.2 eq.) in 1,4‑dioxane; the reaction was stirred at rt for 0.5-2 h. After quenching with aq. satd. NaHCO3 soln., the reaction mixture was worked-up as in method A.

**Preparation of compound 9.** To a stirred soln. of *tert*‑butyl 1‑piperazinecarboxylate (1.0 mmol) in 1,4‑dioxane (5 mL), was added an aq. soln. of K2CO3 (50%) in 1,4‑dioxane, followed by a soln. of a mixture of **7g** and **8g** (1.0 eq.) in 1,4‑dioxane (4 mL). The reaction mixture was stirred at 100ºC for 24h, cooled and concentrated under vacuum. The residue was extracted with ethyl acetate. The organic layer was dried and concentrated to give crude product **9**. CC [*n*‑hexane:EtOAc (1:1)] on silica gel gave pure **9** (oil, 80% yield).
